# Supplementary material for: Cloud-Based Remote Sensing for Wetland Monitoring—A Review
Source: MDPI journal article supplement (doi:10.3390/rs15061660), 2023-03-19
Supplement: s1 [file s1]

Archive with 1 entries (1 files):
- remotesensing-2214353-supplementary.pdf
